## Institutional report - Thoracic general

# Controlling difficult airway by rigid bronchoscope—an old but effective method

Yin-Kai Chao, Yun-Hen Liu, Ming-Ju Hsieh, Yi-Cheng Wu, Hui-Ping Liu, Chao-Jan Wang, Po-Jen Ko\*

Division of Thoracic and Cardiovascular Surgery, Chang Gung Memorial Hospital, Chang Gung University, 5 Fu-Hsing Street, Kweishan, Taoyuan, Taiwan

Received 12 September 2004; received in revised form 16 February 2005; accepted 21 February 2005

### Abstract

Managing the airway of patients with critical tracheal stenosis remains a formidable challenge to surgeons and anesthesiologists. Various methods for controlling the airway have been established to solve this problem. This study describes the critical tracheal stenosis is managed by dilating and coring technique under direct vision with a rigid bronchoscope. From 2001 to 2003, 34 patients (23 males/11 females) with critical tracheal stenosis (>90%) underwent 37 surgical interventions. The etiologies included 8 cases of post-intubation, 7 cases of post-tracheostomy, 5 cases of post-anastomotic, 14 cases of endotracheal tumor (4 primary, 10 secondary), and 3 cases (1 tuberculosis, 1 laser burn, and 1 idiopathic) of other etiologies. All procedures could achieve airway control with rigid bronchoscope. Other endoscopic procedures (laser, and stent placement) were required to achieve a patent airway and seven patients received airway reconstruction as a definite procedure. Rigid bronchoscopy could provide good results for controlling airway in patients with critical trachea stenosis.

© 2005 Published by European Association for Cardio-Thoracic Surgery. All rights reserved.

**Keywords:** Critical tracheal stenosis; Rigid bronchoscopy; Difficult airway

### 1. Introduction

Central airway stenosis, a life-threatening problem, often requires emergent intervention. The modality includes: endoscopic management (core out, laser resection, and stent insertion), percutaneous dilation therapy, and open surgery procedures (airway widening, resection, and end to end anastomosis) [1–3].

The appropriate anesthesia and management of the central airway stenosis challenges both anesthesiologists and thoracic surgeons. Achieving a stable airway in this group of patients to facilitate airway reconstruction as well as bronchoscopic palliation are critical [1–3]. Various airway control methods were developed in search of optimal outcomes for this patient population and each has its own merits and limitations [4–7].

Rigid bronchoscopy is well known as the conventional means of implementing bronchotherapeutic procedures [2,3,8] but the role of rigid bronchoscope in controlling central airway stenosis was not widely employed by medical physicians. This investigation describes the feasibility of effectively managing critical airway by dilation and coring with rigid bronchoscope.

### 2. Materials and methods

From January 2002 to December 2003, 100 patients underwent bronchotherapeutic procedures at Chang Gung Memorial

Hospital (a 3000-bed referral center). Thirty-four (23 males/11 females) of these had life threatening dyspnea due to large airway obstruction and required urgent intervention to relieve airway stenosis. The etiologies included 8 cases of post-intubation tracheal stenosis, 7 cases of post-tracheostomy tracheal stenosis, 5 cases of post-anastomotic stenosis, 14 cases of endotracheal tumor (4 primary, 10 secondary), and 3 cases (1 tuberculosis, 1 laser burn, and 1 idiopathic) of other etiologies. The lesions were all tracheal, and all patients had tracheal stenosis greater than 90%.

Pre-operative assessment of airway stenosis included flexible bronchoscopy, conventional CT scan with 2-D and 3-D reconstruction images, and virtual bronchoscopy. The percentage of obstructions was quantified visually and recorded as a percentage of the luminal area obstructed. Length of the stenosis was determined from the 3D reconstruction images, or alternatively, during surgical intervention

The whole procedure took place in the operation room. Basic monitoring included electrocardiography, oximetry and an arterial line. The tracheostomy tray was prepared and ready in the event of failure to control airway. The patient was placed in supine position and general anesthesia was achieved by short acting narcotics and opioid analgesic agents. After adequate sedation, the team introduced the rigid bronchoscope to assess the severity and location (distance from the vocal cords) of airway obstruction. Then, the beveled tip of Dumon scopes (Novatech; Aubagne, France) was introduced to manipulate, dilate the stenotic region. The stenotic segment was adequately dilat-

\*Corresponding author. Tel.: +886-3-3281200, ext. 2118; fax: +886-3-3285818.

E-mail address: pjko@cgmh.org.tw (P.-J. Ko).

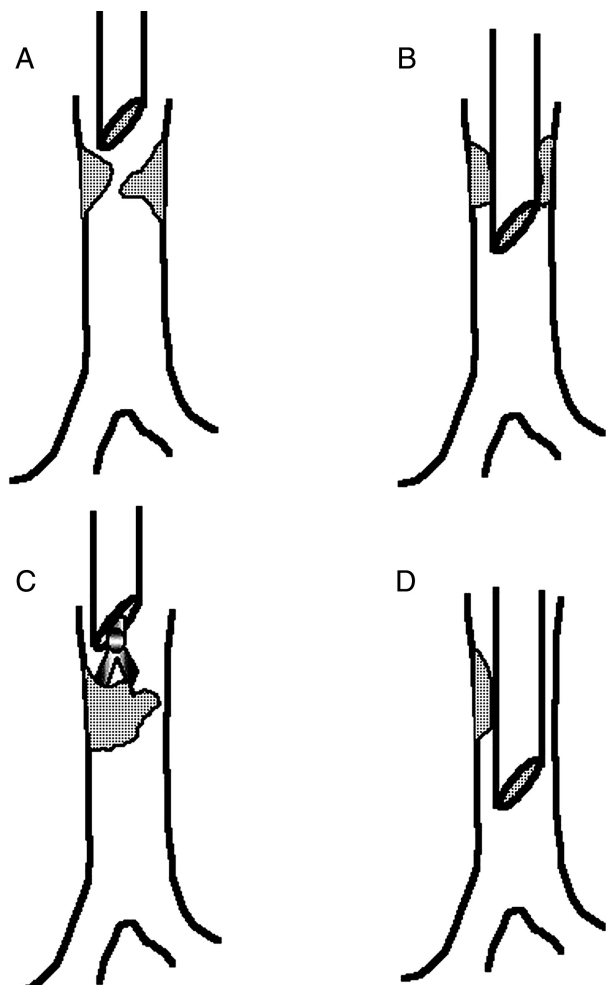

Fig. 1. Schematic representation the techniques: A,B: Dilation. C,D: Core out.

ed by the scope with an outer diameter of 8 mm or changing the scope from 8 mm to 14 mm stepwise. In cases of neoplastic obstruction, coring technique was applied to remove the tumor and achieve airway control (Fig. 1). The endotracheal tube was intubated down through the stenotic segment after therapeutic procedure and all patients were sent to the intensive care unit for further post-operative management. The outcomes were evaluated immediately after procedures and included: (1) successful and unsuccessful airway control; (2) complications related to operations. All parameters are summarized in Table 1.

### 2.1. Post-tracheostomy tracheal stenosis

Of the 7 patients, the stenotic length ranged from 10 to 32 mm, with a mean of 20 mm. The distance from the vocal cords measured 30 to 100 mm, with a mean of 60 mm. All stenotic airways were dilated and airway ventilation was successfully controlled with rigid bronchoscope. Three patients received airway stenting, two received stenotic tracheal resection and reconstructions, one received a long tracheostomy tube for airway stenosis, and

one had stenotic segment dilation as definite procedure. The final respiratory performance was good in all patients.

### 2.2. Post-intubation tracheal stenosis

Of the 8 patients, the stenotic length ranged from 15 to 40 mm, with a mean of 24 mm. The distance from the vocal cord measured from 20 to 90 mm, with a mean of 47 mm. All stenotic airways were successfully controlled by rigid bronchoscope to enable the subsequent procedure for definite treatment. Two patients underwent subglottic laryngotracheal resection and anastomosis (Fig. 3), two received stenotic tracheal resection and primary anastomosis, two received silicone airway stent and one received a Montgomery T tube for stenting. Another patient underwent stenotic segment dilation as definite treatment. All patients survived with good respiratory and phonated functions.

### 2.3. Postanastomotic tracheal stenosis

The underlying disease included tracheal resection in two patients, laryngotracheal resection in two patients, and posttraumatic laryngotracheal separation in one patient. The average length of stenosis measured 19 mm (range 15–20 mm), with an average distance from the vocal cords of 25 mm (range 15–60 mm). The stenotic airway was palpated and dilated with rigid bronchoscope and providing airway control via introducing the scope through the stenotic airway. All patients underwent airway stenting with a Montgomery T tube.

### 2.4. Primary tracheal tumor

Four patients had tracheal stenosis due to primary tracheal tumor (one adenoid cystic carcinoma, one mucoepidermoid carcinoma, one spindle cell tumor, and one granular cell tumor). All but one lesion (lower trachea) was located at the upper trachea. All four patients underwent airway control via rigid bronchoscope and were treated by coring out the obstructing tumor with the rigid bronchoscope (Fig. 2). One patient had tracheal resection after tumor removal under rigid scope, while one patient received laser ablation after the coring out procedure. All these patients had stable airways and good surgical results.

### 2.5. Secondary tracheal tumors

Ten patients with secondary tracheal tumor had critical tracheal stenosis. The etiologies included four patients with esophageal cancer, three with lung cancer, one with mediastinal sarcoma, one with thyroid cancer, and one tongue cancer patient with mediastinal metastasis. The average length of stenosis measured 55 mm (range 15–110 mm). The distance from the vocal cords was from 30 to 100 mm, with a mean of 44 mm. Rigid bronchoscopy was used to explore, ventilate, and dilate airway obstruction for temporary control. Next, eight expandable metal stents and one silicone stent were used in 8 patients because of residual airway stenosis and extreme extrinsic tumor compression. One patient with mediastinal sarcoma required two stents to maintain airway patent (Fig. 4). All patients

Table 1  
Patient characteristics and outcomes of procedures

| Case No. | Age/Sex | Etiology                                          | Stricture severity | Distance from vocal cord | Stricture length | Airway control | Final procedure        |
|----------|---------|---------------------------------------------------|--------------------|--------------------------|------------------|----------------|------------------------|
| 1        | 38/M    | Tracheostomy                                      | 90                 | 35                       | 32               | Yes            | Airway reconstruction  |
| 2        | 46/F    | Tracheostomy                                      | 90                 | 35                       | 25               | Yes            | Airway reconstruction  |
| 3        | 68/F    | Tracheostomy                                      | 90                 | 100                      | 15               | Yes            | Airway stent           |
| 4        | 69/M    | Tracheostomy                                      | 90                 | 100                      | 10               | Yes            | Airway stent           |
| 5        | 57/M    | Tracheostomy                                      | 90                 | 70                       | 15               | Yes            | Airway stent           |
| 6        | 62/F    | Tracheostomy                                      | 90                 | 50                       | 15               | Yes            | Long tracheostomy tube |
| 7        | 55/M    | Tracheostomy                                      | 90                 | 30                       | 15               | Yes            | Dilation               |
| 8        | 39/M    | Intubation                                        | 90                 | 45                       | 20               | Yes            | Airway reconstruction  |
| 9        | 46/F    | Intubation                                        | 90                 | 30                       | 30               | Yes            | Airway reconstruction  |
| 10       | 48/F    | Intubation                                        | 90                 | 30                       | 25               | Yes            | Airway reconstruction  |
| 11       | 54/M    | Intubation                                        | 90                 | 20                       | 30               | Yes            | Airway reconstruction  |
| 12       | 76/F    | Intubation                                        | 90                 | 50                       | 20               | Yes            | Montgomery T-tube      |
| 13       | 78/F    | Intubation                                        | 90                 | 90                       | 15               | Yes            | Airway stent           |
| 14       | 72/M    | Intubation                                        | 90                 | 80                       | 15               | Yes            | Airway stent           |
| 15       | 52/M    | Intubation                                        | 90                 | 30                       | 40               | Yes            | Dilation               |
| 16       | 18/M    | Post-anastomotic                                  | 90                 | 60                       | 15               | Yes            | Montgomery T-tube      |
| 17       | 39/M    | Post-anastomotic                                  | 90                 | 20                       | 20               | Yes            | Montgomery T-tube      |
| 18       | 46/F    | Post-anastomotic                                  | 90                 | 15                       | 20               | Yes            | Montgomery T-tube      |
| 19       | 48/F    | Post-anastomotic                                  | 90                 | 15                       | 20               | Yes            | Montgomery T-tube      |
| 20       | 58/F    | Post-anastomotic                                  | 90                 | 15                       | 20               | Yes            | Montgomery T-tube      |
| 21       | 62/M    | Primary tracheal tumor (Mucoepidermoid tumor)     | 80                 | 80                       | 15               | Yes            | Airway reconstruction  |
| 22       | 46/M    | Primary tracheal tumor (Cystic adenoid carcinoma) | 90                 | 50                       | 15               | Yes            | Core out               |
| 23       | 22/M    | Primary tracheal tumor (Spindle cell)             | 90                 | 30                       | 15               | Yes            | Core out               |
| 24       | 45/M    | Primary tracheal tumor                            | 99                 | 10                       | 15               | Yes            | Core out               |
| 25       | 47/M    | Esophageal cancer                                 | 90                 | 80                       | 40               | Yes            | Airway stent           |
| 26       | 52/M    | Esophageal cancer                                 | 90                 | 40                       | 60               | Yes            | Airway stent           |
| 27       | 56/M    | Esophageal cancer                                 | 90                 | 20                       | 50               | Yes            | Airway stent           |
| 28       | 59/M    | Esophageal cancer                                 | 90                 | 10                       | 50               | Yes            | Airway stent           |
| 29       | 63/M    | Lung cancer with trachea meta                     | 90                 | 50                       | 20               | Yes            | Core out               |
| 30       | 71/M    | Lung cancer with trachea meta                     | 90                 | 40                       | 15               | Yes            | Core out               |
| 31       | 78/M    | Lung cancer with trachea meta                     | 80                 | 10                       | 30               | Yes            | Airway stent           |
| 32       | 68/M    | Tongue cancer with trachea meta                   | 90                 | 80                       | 30               | Yes            | Airway stent           |
| 33       | 56/F    | Thyroid cancer with trachea meta                  | 90                 | 20                       | 25               | Yes            | Airway stent           |
| 34       | 16/M    | Sarcoma with mediastinal involvement              | 99                 | 40                       | 110              | Yes            | Airway stent           |
| 35       | 49/F    | Tracheal stricture                                | 99                 | 20                       | 25               | Yes            | Tracheostomy           |
| 36       | 32/M    | Laser burn                                        | 99                 | 10                       | 10               | Yes            | Tracheostomy           |
| 37       | 68/M    | TB stricture                                      | 90                 | 15                       | 90               | Yes            | Airway stent           |

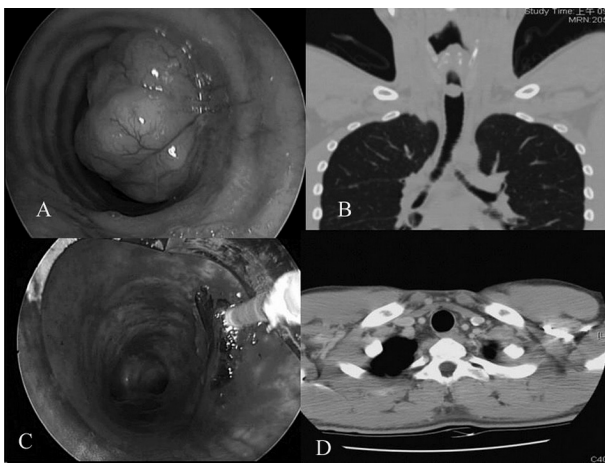

Fig. 2. Endoluminal tumor (cystic adenoid carcinoma) with severe tracheal stenosis: A,B. Preoperative bronchoscopy and CT finding. C. Intraoperative bronchoscopy finding after coring out procedure. D. Postoperative CT image.

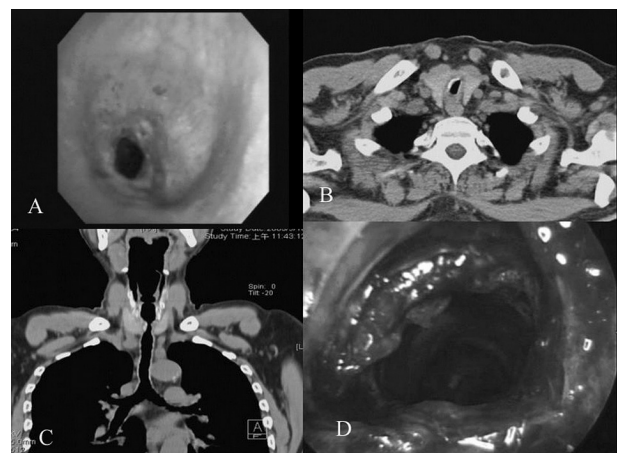

Fig. 3. Post-intubation tracheal stenosis: A,B,C: Bronchoscopic and CT finding before intervention. D. Bronchoscopic finding after rigid bronchoscopic dilation.

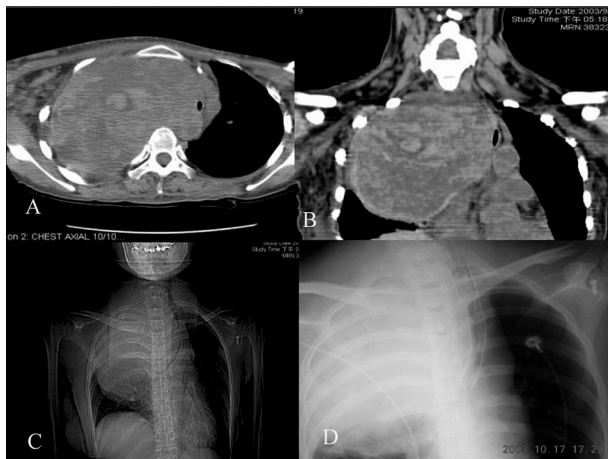

Fig. 4. Mediastinal sarcoma with tracheal compression: A,B,C: Preop CT scan revealed severe airway compression by tumor. D. CXR after airway stenting.

had good airway control during the operation and adequate palliation of respiratory symptoms with rigid bronchoscopy.

## 2.6. Miscellaneous

The underlying diseases were: tuberculous airway stenosis in one case, airway stenosis due to laser surgery in another and stenosis with unknown origin in a third. Rigid bronchoscope was used to assess and dilate the stricture and provide a controlled situation for adequate ventilation and definite procedures in all patients. Therapeutic procedures included incorporated Hood and T stent in one patient and tracheostomy tube in two others. However, one patient with airway stenosis (origin unknown) receiving tracheostomy died with acute airway obstruction 5 days after surgery.

## 2.7. Complications

All stenotic airways were successfully dilated, cored out and intubated with the rigid bronchoscope and provided safe and well-ventilated environments for definite airway procedures. There was no immediate mortality due to loss of control airway. One airway perforation (esophageal cancer with lower trachea and carina invasion) occurred during stenting and the patient died five days after the operation. The second patient with long segment airway stenosis of unknown origin from glottic to main bronchus died five days postoperatively.

## 3. Discussions

Tracheal stenosis continues to be largely owing to trauma, which can be internal (prolonged endotracheal intubation, tracheotomy, flame burn injury) or external (blunt or penetrating neck trauma). The symptoms of central airway stenosis are distressing. Therapeutic strategies for these patients include surgical resection combined with appropriate reconstruction and interventional bronchoscopic procedures (dilation, laser ablation, and tracheobronchial stent).

Achieving good results and preventing perioperative complications in these patients depends on the ability to provide a safe and good ventilating environment before surgical intervention. Among the many anesthesia strategies developed for critical airway management include fiberoptic intubation, laryngeal mask airway, high frequency jet ventilation, total laryngeal bypass device, tracheostomy under local anesthesia, and cardiopulmonary bypass. However, these strategies have their merits and limitations.

Anesthesiologist commonly used fiber-optic intubation with difficult airway. Benum presented a method of initial fiberoptic intubation above the lesion followed by second intubation distal to the lesion after surgical opening of the trachea [15]. In 1999, Mentzelopoulos presented a method combining the use of a Fogarty catheter with fiberoptic bronchoscope and endotracheal tube to intubate the stenotic airway [5]. But there are some limitations in cases with severe stenosis. Because the risk of inadequate ventilation caused by the severity of the stenosis would be present until successful second intubation.

Laryngeal mask airway (LMA) is another effective method for maintaining airway and obtaining an operating field for endoscopic procedures. Parmet JL encouraged LMA insertion as the first alternative in patients with unanticipated simultaneous difficulty with mask ventilation and tracheal intubation [14]. However, for practicability an LMA is not comparable with a rigid bronchoscopy. Because LMA would be applicable only to simple endoscopic procedures, the efficiency and safety of airway control with rigid bronchoscopy is still best for dealing with intra-operative complications of bleeding and tumor extraction [3,8].

High frequency jet ventilation (HFJV) is a conventional method for securing ventilation in rigid and interventional bronchoscopy [6,10,11]. However, this is dangerous in critical laryngeal stenosis (<4.5 mm) because outflow from the lungs may be inadequate. Dworkin first reported that air trapping can occur during jet ventilation if the airway diameter proximal to the tracheal catheter tip is smaller than 4.0 mm [12]. Benum reported the hazard of inadequate outflow causing hypotension and barotraumas to the lungs unless jetting is stopped and an outflow pathway is immediately established [13].

Owing to the risk of jetting ventilation, a new device, total laryngeal bypass device (TLBD), was introduced since 1998 [4]. It is a new device which permits safe ventilation of these patients without tracheotomy. It is based on a coaxial bicannular design that allows 'push-pull' ventilation by jetting gas through the inner cannula and applying suction through the outer cannula. This ideal design could provide actively expiration of gas compared with old jetting device. However, it is not available everywhere.

Cardiopulmonary bypass (CPB) and extracorporeal membrane oxygenation (ECMO) are commonly performed techniques in cardiac surgery. They can be applied either where bulky airway lesion precludes safe ventilation via conventional methods or in the presence of low pulmonary function and respiratory failure. Many authors find CPB and ECMO extremely useful for achieving good cardiopulmonary support during severe tracheal stenosis and in placing airway stents [16,17]. However, due to the serious compli-

cations after CPB [18–20], neither technique was used in the current series.

Thus, tracheotomy under local anesthesia was considered as the safest method of ventilation by many authors [4,5]. However, it is challenging when faced with an uncooperative patient, a difficult airway and indistinct anatomical landmark.

Rigid bronchoscope has several advantages, including simultaneous dilate and visualize the stenotic part. Ventilation could also be maintained via side port and minimize the risk of inadequate ventilation before controlling airway. It is not so invasive as tracheostomy or cardiopulmonary bypass, less risk of barotraumas than jetting device, low equipment demand compared with TLBD [2]. In our experience, starting with an 8 mm Dumon bronchoscope followed by serial dilating the stenotic part or coring the obstructing tumor could achieve safe airway control in all cases. The bronchoscope is introduced through the stenosis with a firm but gentle, slightly rotary movement, the axis of the airway must be kept in mind to avoid penetrating the trachea wall. Minimal biopsy can test vascularity if there is concern. Some authors recommended the use of laser in order to achieve better hemostasis. In our series, bleeding is not often a problem after core out, which could be controlled by direct bronchoscopic pressure.

#### 4. Conclusions

Rigid bronchoscopy is a simple and safe method for airway control in patients with critical trachea stenosis.

#### References

- [1] Grillo HC. Primary reconstruction of airway after resection of subglottic laryngeal and upper tracheal stenosis. *Ann Thorac Surg* 1982; 33:3–18.
- [2] Mathisen DJ, Grillo HC. Endoscopic relief of malignant airway obstruction. *Ann Thorac Surg* 1989;48:469–473.
- [3] Wood DE, Liu Y-H, Vallieres E, Karmy-Jones R, Mulligan MS. Airway stenting for malignant and benign tracheobronchial stenosis. *Ann Thorac Surg* 2003;76:167–172.
- [4] Garry B, Woo P, Perrault DF Jr, Shapshay SM, Wurm WH. Jet ventilation in upper airway obstruction: description and model lung testing of a new jetting device. *Anesthesia & Analgesia* 1998;87(4):915–920.
- [5] Mentzelopoulos SD, Romana CN, Hatzimichalis AG, Tzoufi MJ, Karamichali EA. Anesthesia for tracheal resection: a new technique of airway management in a patient with severe stenosis of the midtrachea. *Anesthesia & Analgesia* 1999;89(5):1156–1160.
- [6] Giunta F, Chiaranda M, Manani G, Giron GP. Clinical uses of high frequency jet ventilation in anaesthesia. *Br J Anaesth* 1989;63:102–106.
- [7] Chiu CL, Teh BT, Wang CY. Temporary cardiopulmonary bypass and isolated lung ventilation for tracheal stenosis and reconstruction. *Br J Anaesth* 2003;91:742–744.
- [8] Cavaliere S, Venuta F, Focoli P, Toninelli C, La Face B. Endoscopic treatment of malignant airway obstructions in 2,008 patients *Chest* 1996;110(6):1536–1542.
- [9] Geffin B, Bland J, Grillo HC. Anesthetic management of tracheal resection and reconstruction. *Anesthesia & Analgesia* 1969;48(5):884–890.
- [10] Hautmann H, Gamarra F, Henke M, Diehm S, Huber RM. High frequency jet ventilation in interventional fiberoptic bronchoscopy. *Anesth Analg* 2000;90:1436–1440.
- [11] Bourgain JL, Desruennes E, Fischler M, Ravussin P. Transtracheal high frequency jet ventilation for endoscopic airway surgery: a multicentre study. *Br J Anaesth* 2001;87:870–875.
- [12] Dworkin R, Benumof JL, Benumof R, Karagianes TG. The effective tracheal diameter that causes air trapping during jet ventilation. *J Cardiothorac Anesth* 1990;4:731–736.
- [13] Benumof JL, Scheller MS. The importance of transtracheal jet ventilation in the management of the difficult airway. *Anesthesiology* 1989;71:769–778.
- [14] Parmet JL, Colonna-Romano P, Horrow JC, Miller F, Gonzales J, Rosenberg H. The laryngeal mask airway reliably provides rescue ventilation in cases of unanticipated difficult tracheal intubation along with difficult mask ventilation. *Anesth Analg* 1998;87:661–665.
- [15] Benumof JL, Alfery DD. Anesthesia for thoracic surgery. In: Miller RD, ed. *Anesthesia* 4th ed. New York: Churchill Livingstone, 1994:1663–1756.
- [16] Pinsonneault C, Fortier J, Donati F. Tracheal resection and reconstruction. *Can J Anaesth* 1999;46:439–455.
- [17] Kameyama K, Maeda M, Okamoto T, Sugita A, Hayashi E, Nakamoto K. Stent intubation for the airway stenosis under PCPS. *Kyobu Geka* 1999;52:1078–1083.
- [18] Kyosola K, Takkunen O, Maamies T, Sipponen J, Viljanen T. Bronchospasm during cardiopulmonary bypass—a potentially fatal complication of open-heart surgery. *Thorac Cardiovasc Surg* 1987;35:375–377.
- [19] Urschel JD, Myerowitz PD. Catheter-induced pulmonary artery rupture in the setting of cardiopulmonary bypass. *Ann Thorac Surg* 1993;56:585–589.
- [20] Duff B, Gruber B. Total tracheobronchial thrombosis due to extracorporeal membrane oxygenation. *Ann Otol Rhinol Laryngol* 1996;105:259–261.
